# Supplementary material for: Functionalization of aerogels by the use of pre-constructed monomers: the case of trifluoroacetylated (3-aminopropyl) triethoxysilane
Source: Royal Society of Chemistry journal article supplement (doi:10.1039/c4ra06974a), 2014-01-01
Supplement: c4ra06974a1.pdf [file c4ra06974a1.pdf]

## Supporting Information

### Functionalization of aerogels by the use of pre-constructed monomers: a case of trifluoroacetylated (3-aminopropyl) triethoxysilane

Sergey A. Lermontov,<sup>\*a</sup> Nataliya A. Sipyagina,<sup>a</sup> Alena N. Malkova,<sup>a</sup> Alexander V. Yarkov,<sup>a</sup> Alexander E. Baranchikov,<sup>b</sup> Vladimir V. Kozik<sup>c</sup> and Vladimir K. Ivanov<sup>b,c</sup>

<sup>a</sup> Institute of Physiologically Active Compounds of the Russian Academy of Sciences, 1 Severnij pr., Chernogolovka, Russia. Fax: +74965249508; Tel: +74965242587; E-mail: lermontov52@yandex.ru

<sup>b</sup> Kurnakov Institute of General and Inorganic Chemistry of the Russian Academy of Sciences, 31 Leninsky av., Moscow, Russia.

<sup>c</sup> National Research Tomsk State University, 36 Lenin av., Tomsk, Russia.

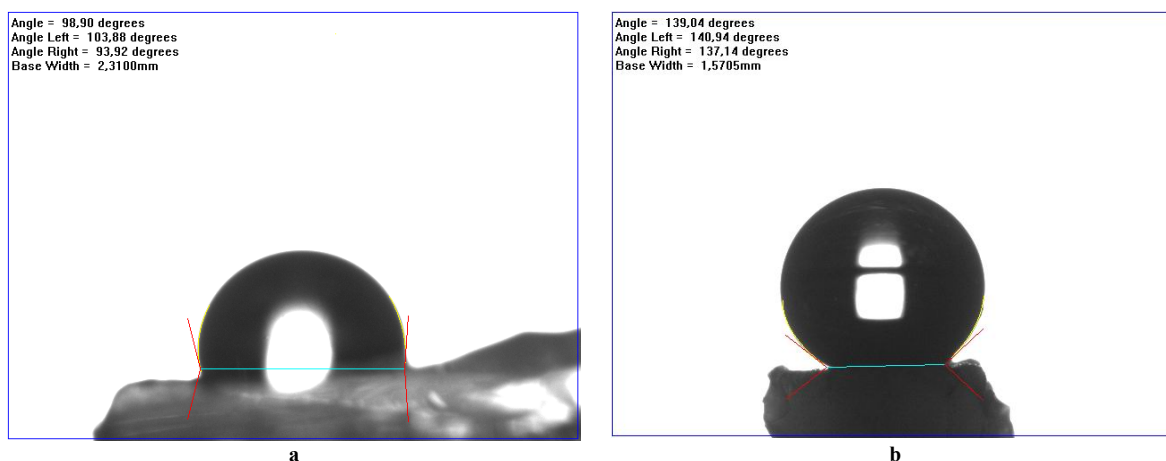

Fig. S1 The water sessile drop contact angles of AG-3 aerogels supercritically dried in CO<sub>2</sub> (a) and HFIP (b).
